# Supplementary material for: Shenshuaikang Enema, a Chinese Herbal Remedy, Inhibited Hypoxia and Reoxygenation-Induced Apoptosis in Renal Tubular Epithelial Cells by Inhibiting Oxidative Damage-Dependent JNK/Caspase-3 Signaling Pathways Using Network Pharmacology
Source: PubMed Central journal article supplement (PMC7685836; doi:10.1155/2020/9457101), 2020-11-17

S1: Ingredients of SE(Safflower, Astragalus radix, Salvia miltiorrhiza, Rhubarb) obtained from TCMSP database.

| Herbal    | Mol ID           | Molecule name                                                                                                    | OB(%)                                                                                                                                                      | DL    |      |
|-----------|------------------|------------------------------------------------------------------------------------------------------------------|------------------------------------------------------------------------------------------------------------------------------------------------------------|-------|------|
| Safflower | MOL001771        | poriferast-5-en-3beta-ol                                                                                         | 36.91                                                                                                                                                      | 0.75  |      |
|           | MOL002680        | Flavoxanthin                                                                                                     | 60.41                                                                                                                                                      | 0.56  |      |
|           | MOL002694        | 4-[(E)-4-(3,5-dimethoxy-4-oxo-1-cyclohexa-2,5-dienylidene)but-2-enylidene]-2,6-dimethoxycyclohexa-2,5-dien-1-one | 48.47                                                                                                                                                      | 0.36  |      |
|           | MOL002695        | lignan                                                                                                           | 43.32                                                                                                                                                      | 0.65  |      |
|           | MOL002698        | lupeol-palmitate                                                                                                 | 33.98                                                                                                                                                      | 0.32  |      |
|           | MOL002706        | Phytoene                                                                                                         | 39.56                                                                                                                                                      | 0.5   |      |
|           | MOL002707        | phytofluene                                                                                                      | 43.18                                                                                                                                                      | 0.5   |      |
|           | MOL002710        | Pyrethrin II                                                                                                     | 48.36                                                                                                                                                      | 0.35  |      |
|           | MOL002712        | 6-Hydroxykaempferol                                                                                              | 62.13                                                                                                                                                      | 0.27  |      |
|           | MOL002714        | baicalein                                                                                                        | 33.52                                                                                                                                                      | 0.21  |      |
|           | MOL002717        | qt_carthamone                                                                                                    | 51.03                                                                                                                                                      | 0.2   |      |
|           | MOL002719        | 6-Hydroxynaringenin                                                                                              | 33.23                                                                                                                                                      | 0.24  |      |
|           | MOL002721        | quercetagenin                                                                                                    | 45.01                                                                                                                                                      | 0.31  |      |
|           | MOL002757        | 7,8-dimethyl-1H-pyrimido[5,6-g]quinoxaline-2,4-dione                                                             | 45.75                                                                                                                                                      | 0.19  |      |
|           | MOL002773        | beta-carotene                                                                                                    | 37.18                                                                                                                                                      | 0.58  |      |
|           | MOL002776        | Baicalin                                                                                                         | 40.12                                                                                                                                                      | 0.75  |      |
|           | MOL000358        | beta-sitosterol                                                                                                  | 36.91                                                                                                                                                      | 0.75  |      |
|           | MOL000422        | kaempferol                                                                                                       | 41.88                                                                                                                                                      | 0.24  |      |
|           | MOL000449        | Stigmasterol                                                                                                     | 43.83                                                                                                                                                      | 0.76  |      |
|           | MOL000006        | luteolin                                                                                                         | 36.16                                                                                                                                                      | 0.25  |      |
|           | MOL000953        | CLR                                                                                                              | 37.87                                                                                                                                                      | 0.68  |      |
|           | MOL000098        | quercetin                                                                                                        | 46.43                                                                                                                                                      | 0.28  |      |
|           | Astragalus radix | MOL000211                                                                                                        | Mairin                                                                                                                                                     | 55.38 | 0.78 |
|           |                  | MOL000239                                                                                                        | Jaranol                                                                                                                                                    | 50.83 | 0.29 |
|           |                  | MOL000296                                                                                                        | hederagenin                                                                                                                                                | 36.91 | 0.75 |
|           |                  | MOL000033                                                                                                        | (3S,8S,9S,10R,13R,14S,17R)-10,13-dimethyl-17-[(2R,5S)-5-propan-2-yl-octan-2-yl]-2,3,4,7,8,9,11,12,14,15,16,17-dodecahydro-1H-cyclopenta[a]phenanthren-3-ol | 36.23 | 0.78 |
| MOL000354 |                  | isorhamnetin                                                                                                     | 49.6                                                                                                                                                       | 0.31  |      |
| MOL000371 |                  | 3,9-di-O-methylnissofin                                                                                          | 53.74                                                                                                                                                      | 0.48  |      |
| MOL000374 |                  | 5'-hydroxyiso-muronulatol-2',5'-di-O-glucoside                                                                   | 41.72                                                                                                                                                      | 0.69  |      |
| MOL000378 |                  | 7-O-methylisomucronulatol                                                                                        | 74.69                                                                                                                                                      | 0.3   |      |
| MOL000379 |                  | 9,10-dimethoxypterocarpan-3-O-β-D-glucoside                                                                      | 36.74                                                                                                                                                      | 0.92  |      |
| MOL000380 |                  | (6aR,11aR)-9,10-dimethoxy-6a,11a-dihydro-6H-benzofurano[3,2-c]chromen-3-ol                                       | 64.26                                                                                                                                                      | 0.42  |      |
| MOL000387 |                  | Bifendate                                                                                                        | 31.1                                                                                                                                                       | 0.67  |      |
| MOL000392 |                  | formononetin                                                                                                     | 69.67                                                                                                                                                      | 0.21  |      |

|            |           |                                                                                        |        |      |
|------------|-----------|----------------------------------------------------------------------------------------|--------|------|
|            | MOL000398 | isoflavanone                                                                           | 109.99 | 0.3  |
|            | MOL000417 | Calycosin                                                                              | 47.75  | 0.24 |
|            | MOL000422 | kaempferol                                                                             | 41.88  | 0.24 |
|            | MOL000433 | FA                                                                                     | 68.96  | 0.71 |
|            | MOL000438 | (3R)-3-(2-hydroxy-3,4-dimethoxyphenyl)chroman-7-ol                                     | 67.67  | 0.26 |
|            | MOL000439 | isomucronulatol-7,2'-di-O-glucosiole                                                   | 49.28  | 0.62 |
|            | MOL000442 | 1,7-Dihydroxy-3,9-dimethoxy pterocarpene                                               | 39.05  | 0.48 |
|            | MOL000098 | quercetin                                                                              | 46.43  | 0.28 |
| Salvia     |           |                                                                                        |        |      |
| miltiorrhi | MOL001601 | 1,2,5,6-tetrahydrotanshinone                                                           | 38.75  | 0.36 |
| za         |           |                                                                                        |        |      |
|            | MOL001659 | Poriferasterol                                                                         | 43.83  | 0.76 |
|            | MOL001771 | poriferast-5-en-3beta-ol                                                               | 36.91  | 0.75 |
|            | MOL001942 | isoimperatorin                                                                         | 45.46  | 0.23 |
|            | MOL002222 | sugiol                                                                                 | 36.11  | 0.28 |
|            | MOL002651 | Dehydrotanshinone II A                                                                 | 43.76  | 0.4  |
|            | MOL002776 | Baicalin                                                                               | 40.12  | 0.75 |
|            | MOL000569 | digallate                                                                              | 61.85  | 0.26 |
|            | MOL000006 | luteolin                                                                               | 36.16  | 0.25 |
|            | MOL006824 | $\alpha$ -amyrin                                                                       | 39.51  | 0.76 |
|            | MOL007036 | 5,6-dihydroxy-7-isopropyl-1,1-dimethyl-2,3-dihydrophenanthren-4-one                    | 33.77  | 0.29 |
|            | MOL007041 | 2-isopropyl-8-methylphenanthrene-3,4-dione                                             | 40.86  | 0.23 |
|            | MOL007045 | 3 $\alpha$ -hydroxytanshinone II a                                                     | 44.93  | 0.44 |
|            | MOL007048 | (E)-3-[2-(3,4-dihydroxyphenyl)-7-hydroxy-benzofuran-4-yl]acrylic acid                  | 48.24  | 0.31 |
|            | MOL007049 | 4-methylenemiltirone                                                                   | 34.35  | 0.23 |
|            | MOL007050 | 2-(4-hydroxy-3-methoxyphenyl)-5-(3-hydroxypropyl)-7-methoxy-3-benzofurancarboxaldehyde | 62.78  | 0.4  |
|            | MOL007051 | 6-o-syringyl-8-o-acetyl shanzhiside methyl ester                                       | 46.69  | 0.71 |
|            | MOL007058 | formyltanshinone                                                                       | 73.44  | 0.42 |
|            | MOL007059 | 3-beta-Hydroxymethylenetanshinquinone                                                  | 32.16  | 0.41 |
|            | MOL007061 | Methylenetanshinquinone                                                                | 37.07  | 0.36 |
|            | MOL007063 | przewalskin a                                                                          | 37.11  | 0.65 |
|            | MOL007064 | przewalskin b                                                                          | 110.32 | 0.44 |
|            | MOL007068 | Przewaquinone B                                                                        | 62.24  | 0.41 |
|            | MOL007069 | przewaquinone c                                                                        | 55.74  | 0.4  |
|            | MOL007070 | (6S,7R)-6,7-dihydroxy-1,6-dimethyl-8,9-dihydro-7H-naphtho[8,7-g]benzofuran-10,11-dione | 41.31  | 0.45 |
|            | MOL007071 | przewaquinone f                                                                        | 40.31  | 0.46 |
|            | MOL007077 | sclareol                                                                               | 43.67  | 0.21 |
|            | MOL007079 | tanshinaldehyde                                                                        | 52.47  | 0.45 |
|            | MOL007081 | Danshenol B                                                                            | 57.95  | 0.56 |
|            | MOL007082 | Danshenol A                                                                            | 56.97  | 0.52 |
|            | MOL007085 | Salvilenone                                                                            | 30.38  | 0.38 |
|            | MOL007088 | cryptotanshinone                                                                       | 52.34  | 0.4  |

|         |           |                                                                                          |        |      |
|---------|-----------|------------------------------------------------------------------------------------------|--------|------|
|         | MOL007093 | dan-shexinkum d                                                                          | 38.88  | 0.55 |
|         | MOL007094 | danshenspiroketallactone                                                                 | 50.43  | 0.31 |
|         | MOL007098 | deoxyneocryptotanshinone                                                                 | 49.4   | 0.29 |
|         | MOL007100 | dihydrotanshinlactone                                                                    | 38.68  | 0.32 |
|         | MOL007101 | dihydrotanshinone I                                                                      | 45.04  | 0.36 |
|         | MOL007105 | epidanshenspiroketallactone                                                              | 68.27  | 0.31 |
|         | MOL007107 | C09092                                                                                   | 36.07  | 0.25 |
|         | MOL007108 | isocryptotanshi-none                                                                     | 54.98  | 0.39 |
|         | MOL007111 | Isotanshinone II                                                                         | 49.92  | 0.4  |
|         | MOL007115 | manool                                                                                   | 45.04  | 0.2  |
|         | MOL007118 | microstegiol                                                                             | 39.61  | 0.28 |
|         | MOL007119 | miltionone I                                                                             | 49.68  | 0.32 |
|         | MOL007120 | miltionone II                                                                            | 71.03  | 0.44 |
|         | MOL007121 | miltipolone                                                                              | 36.56  | 0.37 |
|         | MOL007122 | Miltirone                                                                                | 38.76  | 0.25 |
|         | MOL007123 | miltirone II                                                                             | 44.95  | 0.24 |
|         | MOL007124 | neocryptotanshinone ii                                                                   | 39.46  | 0.23 |
|         | MOL007125 | neocryptotanshinone                                                                      | 52.49  | 0.32 |
|         | MOL007127 | 1-methyl-8,9-dihydro-7H-naphtho[5,6-g]benzofuran-6,10,11-trione                          | 34.72  | 0.37 |
|         | MOL007130 | prolithospermic acid                                                                     | 64.37  | 0.31 |
|         | MOL007132 | (2R)-3-(3,4-dihydroxyphenyl)-2-[(Z)-3-(3,4-dihydroxyphenyl)acryloyl]oxypropionic acid    | 109.38 | 0.35 |
|         | MOL007140 | (Z)-3-[2-[(E)-2-(3,4-dihydroxyphenyl)vinyl]-3,4-dihydroxy-phenyl]acrylic acid            | 88.54  | 0.26 |
|         | MOL007141 | salvianolic acid g                                                                       | 45.56  | 0.61 |
|         | MOL007142 | salvianolic acid j                                                                       | 43.38  | 0.72 |
|         | MOL007143 | salvilenone I                                                                            | 32.43  | 0.23 |
|         | MOL007145 | salviolone                                                                               | 31.72  | 0.24 |
|         | MOL007149 | NSC 122421                                                                               | 34.49  | 0.28 |
|         | MOL007150 | (6S)-6-hydroxy-1-methyl-6-methylol-8,9-dihydro-7H-naphtho[8,7-g]benzofuran-10,11-quinone | 75.39  | 0.46 |
|         | MOL007151 | Tanshindiol B                                                                            | 42.67  | 0.45 |
|         | MOL007152 | Przewaquinone E                                                                          | 42.85  | 0.45 |
|         | MOL007154 | tanshinone iia                                                                           | 49.89  | 0.4  |
|         | MOL007155 | (6S)-6-(hydroxymethyl)-1,6-dimethyl-8,9-dihydro-7H-naphtho[8,7-g]benzofuran-10,11-dione  | 65.26  | 0.45 |
|         | MOL007156 | tanshinone VI                                                                            | 45.64  | 0.3  |
| Rhubarb | MOL002235 | EUPATIN                                                                                  | 50.8   | 0.41 |
|         | MOL002251 | Mutatochrome                                                                             | 48.64  | 0.61 |
|         | MOL002259 | Physciondiglucoside                                                                      | 41.65  | 0.63 |
|         | MOL002260 | Procyanidin B-5,3'-O-gallate                                                             | 31.99  | 0.32 |
|         | MOL002268 | rhein                                                                                    | 47.07  | 0.28 |
|         | MOL002276 | Sennoside E Qt                                                                           | 50.69  | 0.61 |
|         | MOL002280 | Torachryson-8-O-beta-D-(6'-oxayl)-glucoside                                              | 43.02  | 0.74 |

---

|           |                                          |       |      |
|-----------|------------------------------------------|-------|------|
| MOL002281 | Toralactone                              | 46.46 | 0.24 |
| MOL002288 | Emodin-1-O-beta-D-glucopyranoside        | 44.81 | 0.8  |
| MOL002293 | Sennoside D_qt                           | 61.06 | 0.61 |
| MOL002297 | Daucosterol_qt                           | 35.89 | 0.7  |
| MOL002303 | palmidin A                               | 32.45 | 0.65 |
| MOL000358 | beta-sitosterol                          | 36.91 | 0.75 |
| MOL000471 | aloe-emodin                              | 83.38 | 0.24 |
| MOL000554 | gallic acid-3-O-(6'-O-galloyl)-glucoside | 30.25 | 0.67 |
| MOL000096 | (-)-catechin                             | 49.68 | 0.24 |

---

S2: The screening process of core targets of SE for AKI. SE(Safflower, Astragalus radix, Salvia miltiorrhiza, Rhubarb).

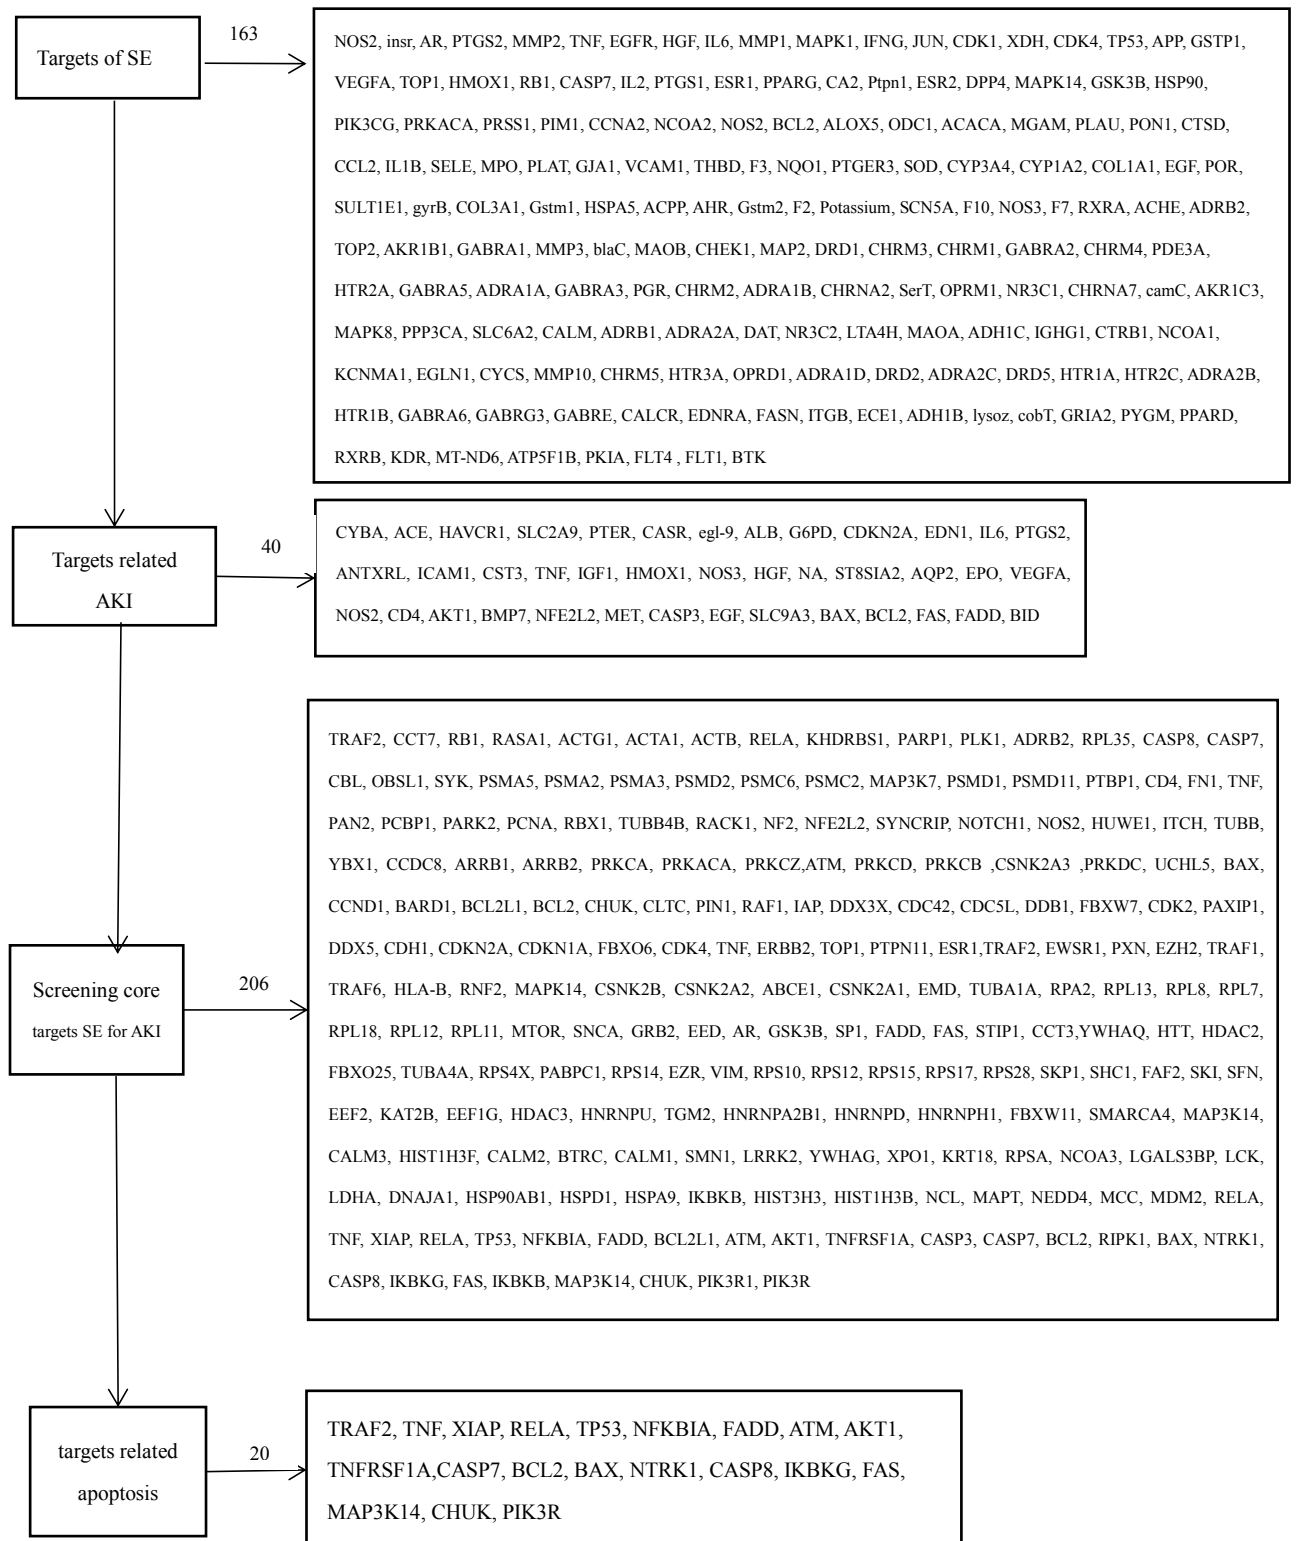

Supplement: 9457101.f1.pdf [file 9457101.f1.pdf]
